# Supplementary material
Source: PubMed Central journal article supplement (PMC8919527)
Supplement: NIHMS1782721-supplement-1.pdf [file NIHMS1782721-supplement-1.pdf]

### Supplementary data

**Supplementary Table 1.** Definitions of suboptimal side branch result during provisional stenting approach in recent study protocols.

**Supplementary Table 2.** Adverse events comparison at the longest available follow-up in trials comparing PCI and CABG in patients with unprotected left main disease.

*The supplementary data are published online at:*  
<https://eurointervention.pcronline.com/>  
[doi/10.4244/EIJ-D-20-00169](https://doi.org/10.4244/EIJ-D-20-00169)

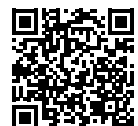

## Supplementary data

**Supplementary Table 1. Definitions of suboptimal side branch result during provisional stenting approach in recent study protocols.**

| <b>ASSESSMENT METHODOLOGY</b>            | <b>SUBOPTIMAL SIDE BRANCH RESULT DEFINITION</b>                                           | <b>REFERENCE (DOI)</b>                                     |
|------------------------------------------|-------------------------------------------------------------------------------------------|------------------------------------------------------------|
|                                          |                                                                                           |                                                            |
| <b>Visual angiography</b>                | TIMI flow <3                                                                              | 10.1161/CIRCULATIONAHA.106.664920                          |
|                                          | TIMI flow <3 or DS >75%                                                                   | 10.1136/openhrt-2018-000947                                |
|                                          | TIMI flow <3 or DS >70% or threatened SB closure, or dissection type >A                   | 10.1161/CIRCULATIONAHA.109.888297                          |
|                                          | Decreased TIMI flow or DS >50%, or dissection type >B                                     | 10.1016/j.jacc.2010.10.023                                 |
|                                          | TIMI <3 (non-LM bifurcations)                                                             | 10.1016/j.jcin.2015.11.037                                 |
|                                          | DS >75% (non-LM bifurcations)                                                             | 10.1016/j.jcin.2015.11.037                                 |
|                                          | DS >75% (LM bifurcations)                                                                 | 10.1016/j.jcin.2015.11.037                                 |
|                                          | DS >50% (LM bifurcations)                                                                 | 10.1016/j.jcin.2015.11.037                                 |
|                                          | TIMI <3, DS >70%, or dissection type >A                                                   | 10.1016/j.jcin.2014.12.221                                 |
|                                          | TIMI flow <3 or DS >90% or threatened SB closure, or dissection type >A (LM bifurcations) | 10.4244/EIJV12I1A8<br>10.1161/CIRCINTERVENTIONS.115.003643 |
|                                          | TIMI flow <3 or DS >75% or dissection type >B                                             | 10.1016/j.jacc.2017.09.1066                                |
|                                          |                                                                                           |                                                            |
| <b>3D quantitative coronary analysis</b> | SB lumen area <50% of SB reference area                                                   | 10.1002/ccd.23218                                          |
|                                          |                                                                                           |                                                            |
| <b>Fractional flow reserve (FFR)</b>     | FFR <0.75                                                                                 | 10.1093/eurheartj/ehn045                                   |
|                                          | FFR <0.80                                                                                 | 10.1016/j.jcin.2014.12.221<br>10.1016/j.jcin.2019.02.037   |

|                                            |                                                   |                           |
|--------------------------------------------|---------------------------------------------------|---------------------------|
|                                            |                                                   |                           |
| <b>Instantaneous wave-free ratio (iFR)</b> | iFR $\leq$ 0.89                                   | 10.1016/j.ihj.2018.01.028 |
|                                            |                                                   |                           |
|                                            |                                                   |                           |
| <b>Optical coherence tomography</b>        | SB minimal diameter <50% of SB reference diameter | 10.1016/j.ahj.2018.08.003 |
|                                            |                                                   |                           |
| <b>Intracoronary ECG</b>                   | ST-segment elevation >1 mm                        | 10.4244/EIJ-D-17-00189    |
|                                            |                                                   |                           |

DOI: digital object identifier; DS: diameter stenosis; FFR: fractional flow reserve; iFR: instantaneous wave-free ratio; LM: left main; SB: side branch; TIMI: Thrombolysis In Myocardial Infarction

**Supplementary Table 2. Adverse events comparison at the longest available follow-up in trials comparing PCI and CABG in patients with unprotected left main disease.** (Data extracted from meta-analysis by Ahmad et al, Eur Heart J 2020. [39]).

| <b>ENDPOINT</b>                    | <b>PCI vs CABG<br/>ODDS RATIO (95% CI)</b> | <b><i>p</i>-value</b> |
|------------------------------------|--------------------------------------------|-----------------------|
|                                    |                                            |                       |
| <b>Total mortality</b>             | 1.03 (0.82-1.30)                           | 0.779                 |
| <b>Cardiac death</b>               | 1.03 (0.79-1.34)                           | 0.817                 |
| <b>Stroke</b>                      | 0.74 (0.36-1.50)                           | 0.400                 |
| <b>Myocardial infarction</b>       | 1.22 (0.96-1.56)                           | 0.110                 |
| <b>Unplanned revascularisation</b> | 1.73 (1.49-2.02)                           | <0.001                |

CI: confidence interval
